# Supplementary material for: Differential contribution of working memory to auditory rhythm discrimination in stuttering and nonstuttering adults
Source: Research Square preprint supplement (doi:10.21203/rs.3.rs-6686913/v1), 2025-06-11
Supplement: Supplementary file 1 [file 3a13b94d02a4e1f89634fd2c.docx]

**Supplementary Material**

**Rhythm discrimination performance in each separate dataset**

***Study 1***


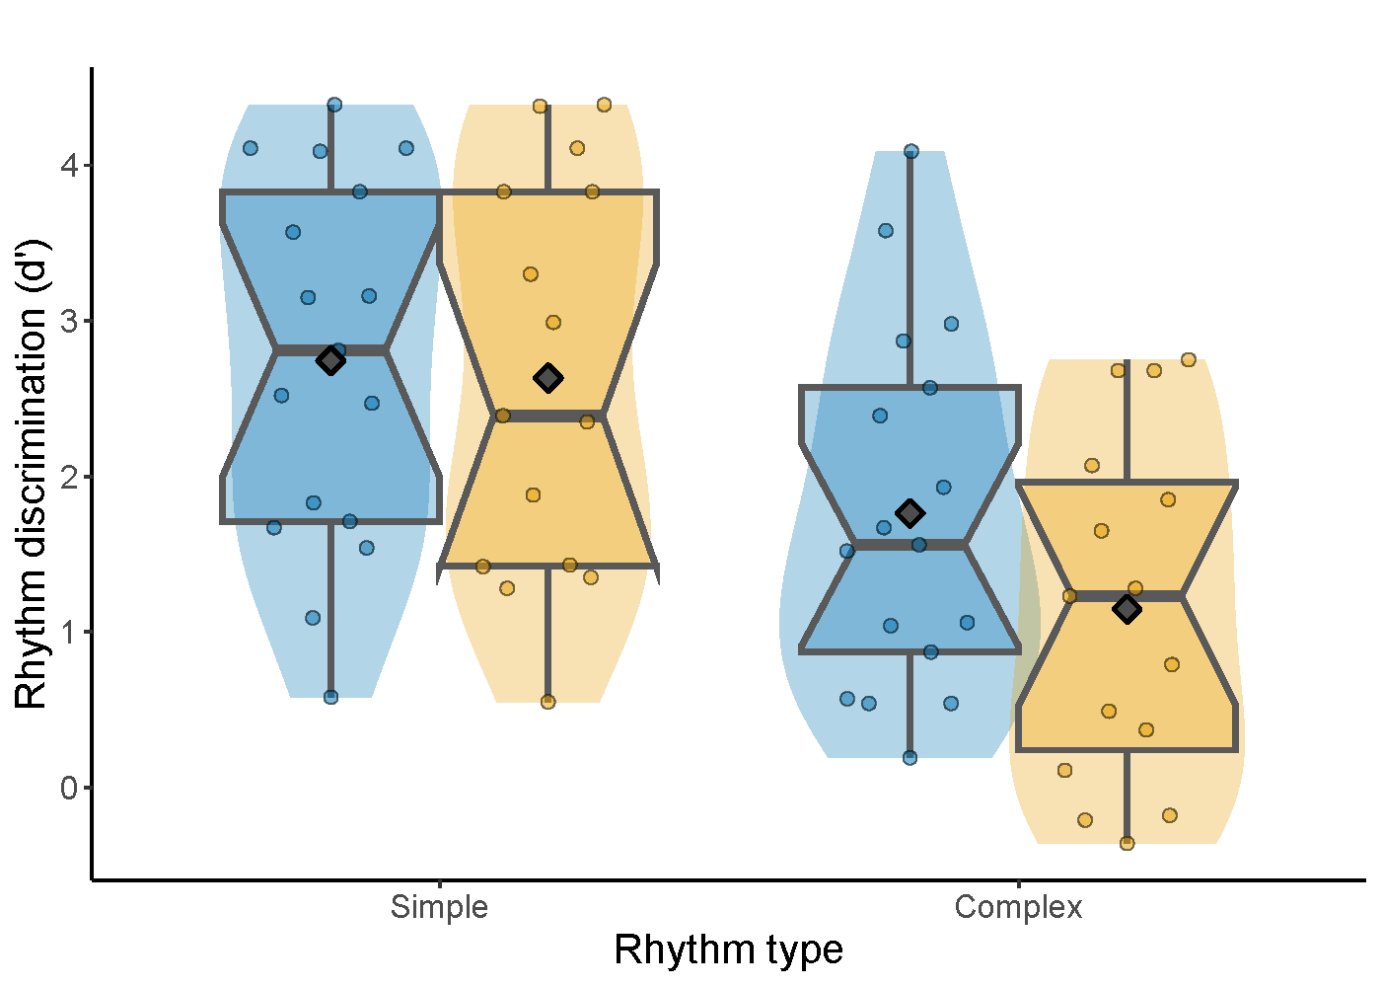

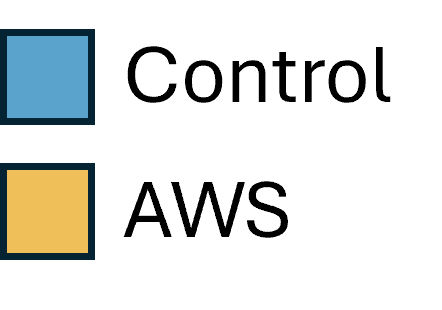
The omnibus 2 (Group: AWS vs Controls) × 2 (Rhythm Type: Simple vs Complex) mixed-measures ANOVA on d’ revealed a main effect of Rhythm Type, *F*(1, 32) = 103.96, *p* < 0.001, *η2* = 0.77, with simple rhythms (*M* = 2.65, 95 % CI [2.23, 3.08], SD = 1.19) better discriminated than complex rhythms (*M* = 1.41, 95 % CI [1.02, 1.80], SD = 1.15). There was no overall main effect of Group, *F*(1, 32) = 1.35, *p* = 0.253, *η2* = 0.04, but a significant interaction between Group and Rhythm Type, *F*(1, 32) = 4.67, *p* = 0.038, *η2* = 0.13. Further, because we had the a priori hypothesis that a rhythm deficit in AWS would be specific to complex rhythms, we conducted separate between-group comparisons for simple and complex rhythms, which showed no statistically significant group differences for either complex rhythm discrimination (AWS: *M* = 1.06, *SD* = 1.07; Controls: *M* = 1.76, *SD* = 1.15), *t*(32) = 1.85, *p* = 0.074, Cohen’s *d* = 0.63, or simple rhythm discrimination (AWS: *M* = 2.57, *SD* = 1.23; Controls: *M* = 2.74, *SD* = 1.19), *t*(32) = 0.428, *p* = 0.672, Cohen’s *d* = 0.15. Although not reaching significance, the difference for complex rhythm discrimination was in the hypothesized direction, with AWS having somewhat worse rhythm discrimination than controls.

***Study 2***


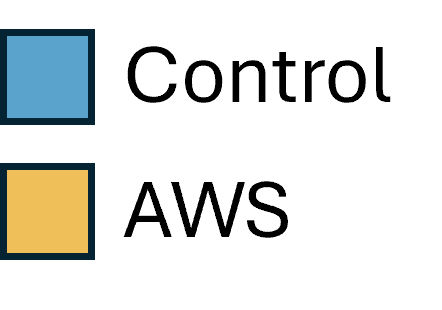
The omnibus 2 (Group: AWS vs Controls) × 2 (Rhythm Type: Simple vs Complex) mixed-measures ANOVA on d’ revealed a main effect of Rhythm Type, *F*(1, 51) = 30.90, *p* < 0.001, *η2* = 0.38, with simple rhythms (*M* = 2.13, 95 % CI [1.88, 2.38], SD = 0.90) better discriminated than complex rhythms (*M* = 1.68, 95 % CI [1.45, 1.92], SD = 0.85). There was no overall main effect of Group, *F*(1, 51) = 0.24, *p* = 0.623, *η2* = 0.05, and no significant interaction between Group and Rhythm Type, *F*(1, 51) = 0.32, *p* = 0.58, *η2* = 0.01. Further, because we had the a priori hypothesis that a rhythm deficit in AWS would be specific to complex rhythms, we conducted separate between-group comparisons for simple and complex rhythms, which showed no group differences for either complex rhythm discrimination (AWS: *M* = 1.65, *SD* = 0.92; Control: *M* = 1.72, *SD* = 0.79), *t*(51) = 0.29, *p* = 0.773 Cohen’s *d*= 0.08, or simple rhythm discrimination (AWS: *M* = 2.05, *SD* = 0.99; Control: *M* = 2.21, *SD* = 0.81), *t*(51) = 0.64, *p* = 0.528 Cohen’s *d* = 0.17.


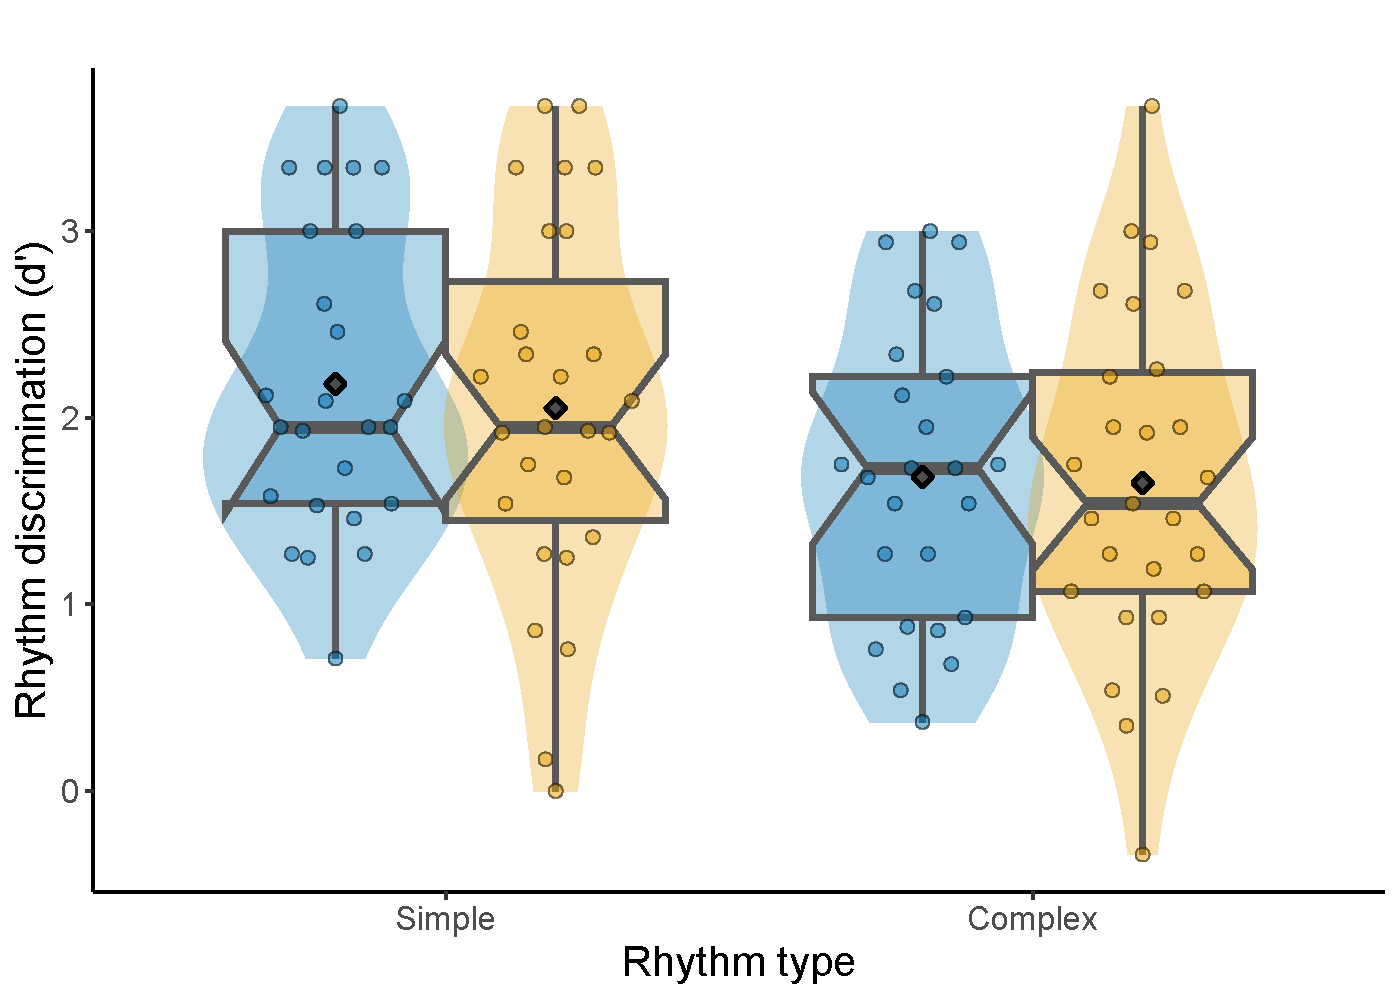


***Study 3***

The omnibus 2 (Group: AWS vs Controls) × 2 (Rhythm Type: Simple vs Complex) mixed-measures ANOVA on d’ revealed a main effect of Rhythm Type, *F*(1, 70) = 16.66, *p* < 0.001, *η2* = 0.19, with simple rhythms (*M* = 2.29, 95 % CI [2.04, 2.54], SD = 0.97) better discriminated than complex rhythms (*M* = 1.92, 95 % CI [1.69, 2.16], SD = 0.91). There was no overall main effect of Group, *F*(1, 70) = 0.02, *p* = 0.886, *η2* = 0.00, and no significant interaction between Group and Rhythm Type, *F*(1, 70) = 1.90, *p* = 0.173, *η2* = 0.03. Further, because we had the a priori hypothesis that a rhythm deficit in AWS would be specific to complex rhythms, we conducted separate between-group comparisons for simple and complex rhythms, which showed no significant group difference in complex rhythm discrimination (AWS: *M* = 1.88, *SD* = 1.05; Control: *M* = 1.97, *SD* = 0.86), *t*(70) = 0.388, *p* = 0.699, Cohen’s *d* = 0.10, or simple rhythm discrimination (AWS: *M* = 2.37, *SD* = 1.05; Control: *M* = 2.21, *SD* = 0.94), *t*(70) = 0.624, *p* = 0.534, Cohen’s *d* = 0.16.


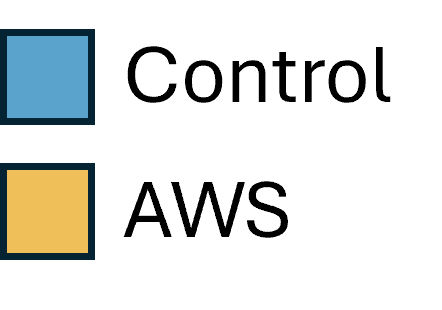
**
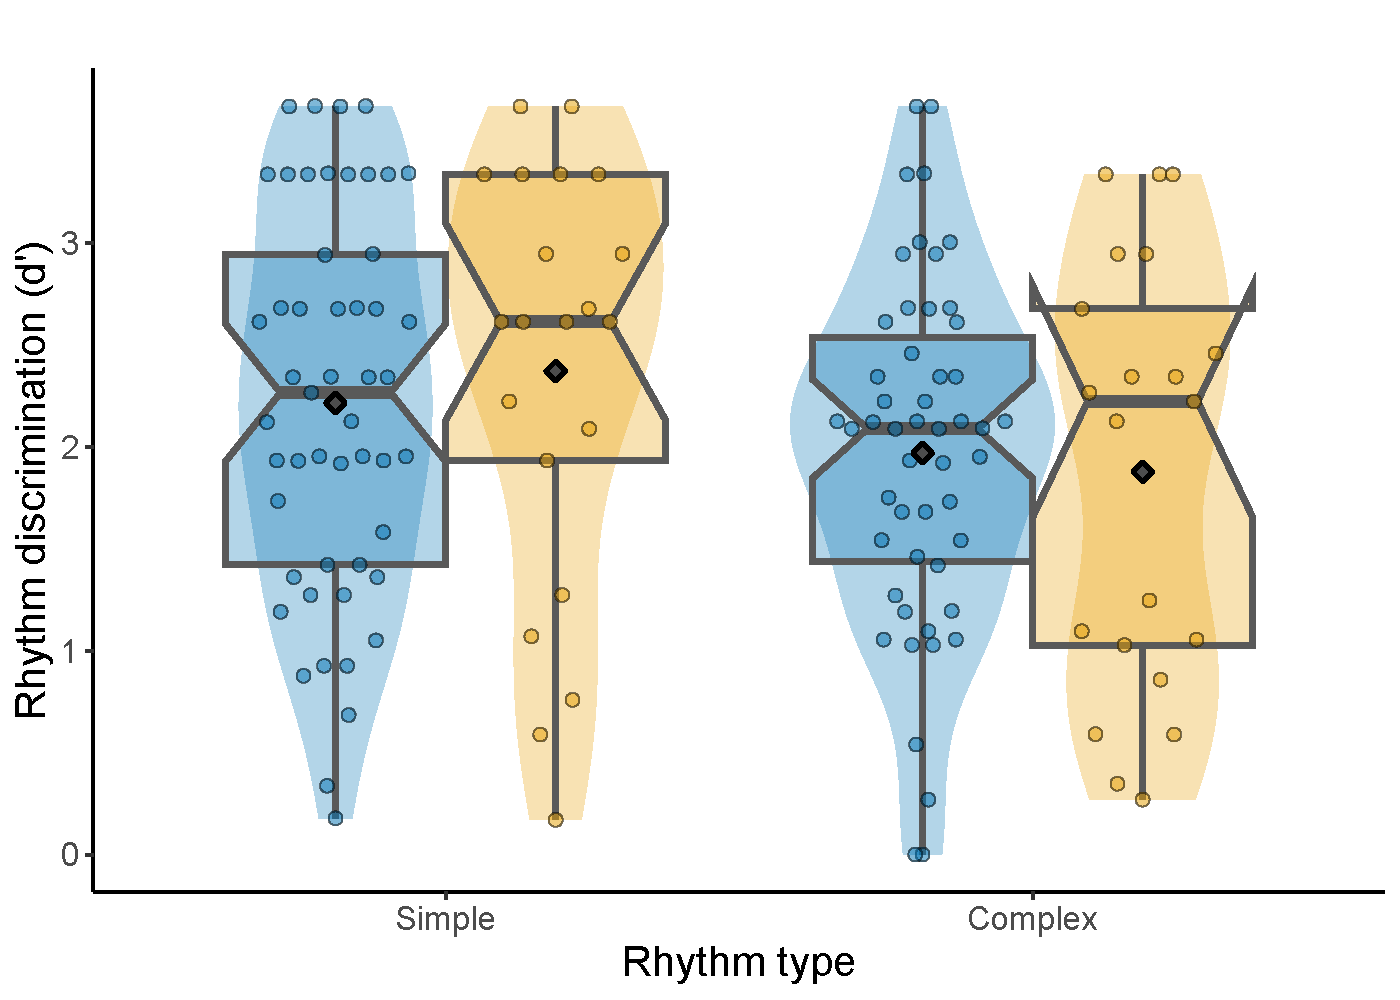
**

**Correlations between rhythm discrimination and working memory for each separate dataset**

***Study 1***

Pearson correlations were computed separately for AWS and controls between the working memory measure (OSPAN partial scores) and simple or complex rhythm discrimination scores (*d*’). Simple rhythm discrimination was significantly positively correlated with working memory in AWS, *r*(15) = 0.53, *p* = 0.03, but not in controls, *r*(15) = 0.26, *p* = 0.312. A comparison of correlation strength between groups using the Fischer r-to-z transformation did not show a significant difference, *z* = 0.84, *p* = 0.2005 (one-tailed). Similarly, complex rhythm discrimination was significantly positively correlated with working memory in AWS, *r*(15) = 0.49, *p* = 0.045, but not in controls, *r*(15) = 0.27, *p* = 0.296, but the group difference between correlations was not significant, *z* = 0.69, *p* = 0.2451 (one-tailed).

**
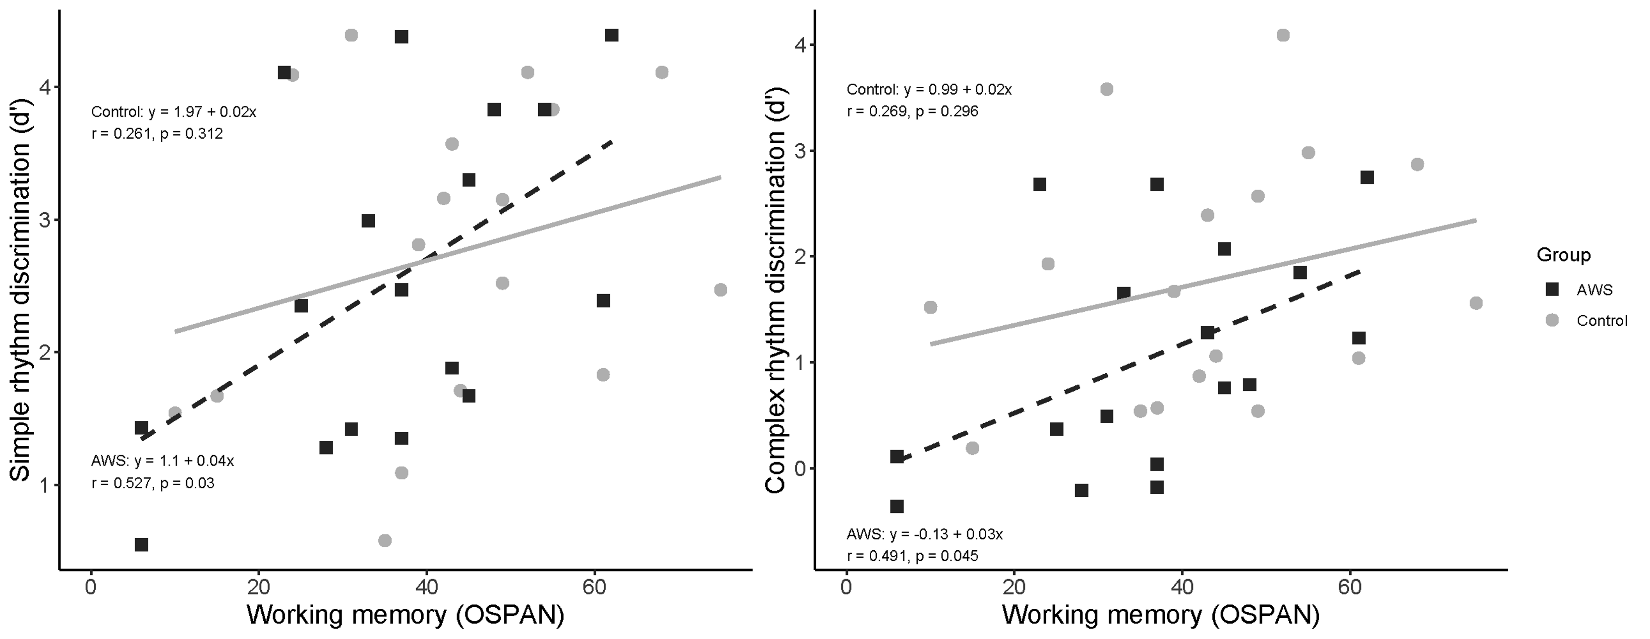
**

***Study 2***

Pearson correlations were computed separately for AWS and controls between working memory (OSPAN) and simple or complex rhythm discrimination scores (*d*’). A positive correlation between simple rhythm discrimination and working memory approached (but did not reach) significance in AWS, *r*(25) = 0.35, *p* = 0.070, and there was no correlation among controls, *r*(24) = 0.10, *p* = 0.643. A comparison of correlation strength between groups using the Fischer r-to-z transformation did not show a significant difference, *z* = 0.94, *p* = 0.1736 (one-tailed). Complex rhythm discrimination was significantly positively correlated with working memory in AWS, *r*(25) = 0.47, *p* = 0.013, but not in controls, *r*(24) = 0.34, *p* = 0.087, but the group difference between correlations was not significant, *z* = 0.53, *p* = 0.2981 (one-tailed).


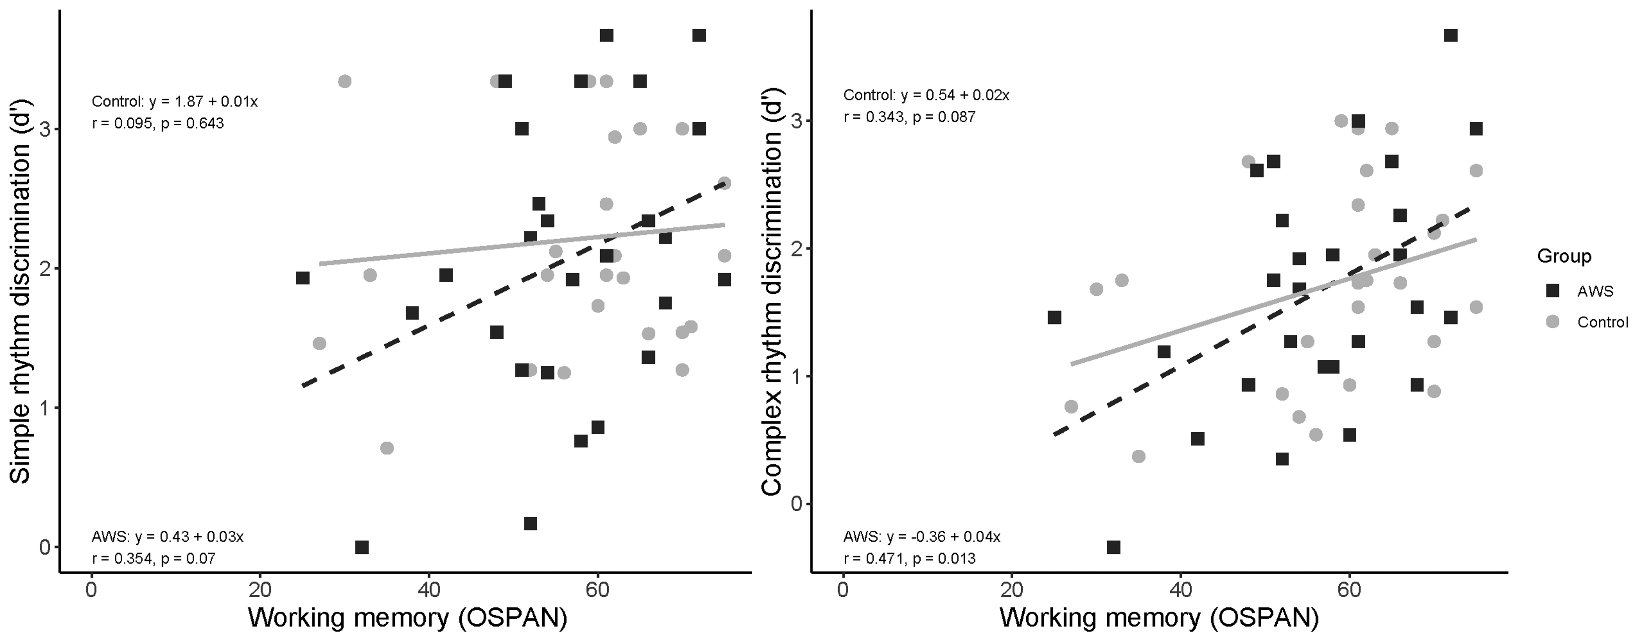


***Study 3***

Pearson correlations were computed separately for AWS and controls between working memory (OSPAN partial scores) and simple or complex rhythm discrimination scores (*d*’). Simple rhythm discrimination was positively correlated with working memory in AWS, *r*(19) = 0.59, *p* = 0.005, but not in controls, *r*(49) = 0.09, *p* = 0.530. A comparison of correlation strength between groups using the Fischer r-to-z transformation showed a significant difference, *z* = 2.11, *p* = 0.0174 (one-tailed), with AWS exhibiting a stronger relationship between simple rhythm discrimination and working memory than controls. Similarly, complex rhythm discrimination was significantly positively correlated with working memory in AWS, *r*(19) = 0.53, *p* = 0.013, but not in controls, *r*(49) = 0.16, *p* = 0.273. In this case, the group difference between correlations approached but did not reach significance, *z* = 1.58, *p* = 0.0571 (one-tailed).


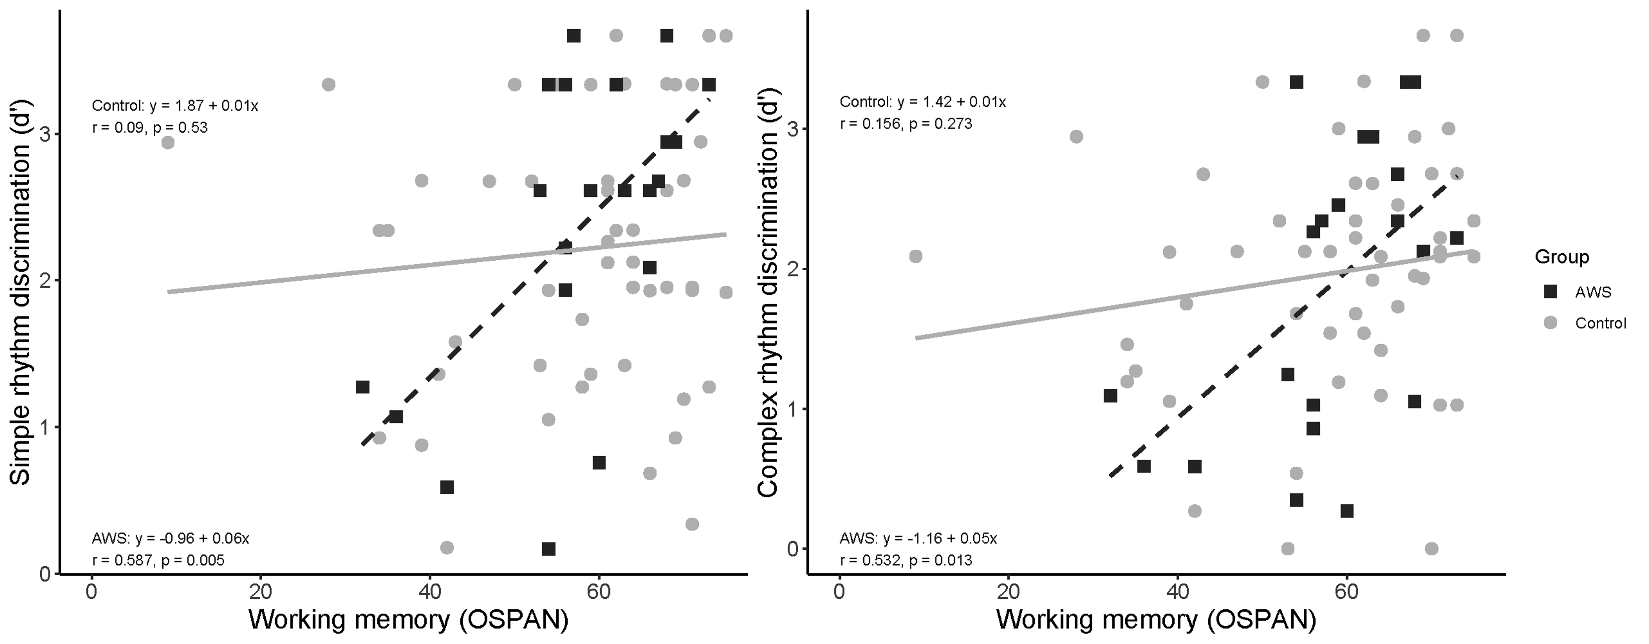


***Correlation Comparisons Excluding Outlier***

There was one control participant from Study 3 with an OSPAN score which fell more than 3 SD below the Study 3 mean. We re-ran the correlations and Fischer r-to-z tests without the outlier participant and found similar results. Simple rhythm discrimination was not significantly correlated with working memory for controls, *r*(90) = 0.16, *p* = 0.123, and the group difference between correlations was again significant (*z* = 2.11, *p* = 0.0172, one-tailed), with AWS exhibiting a stronger correlation than controls. Similarly, complex rhythm discrimination was still significantly positively correlated with working memory for controls, *r*(90) = 0.25, *p* = 0.016, with the correlation remaining larger for AWS than for controls (*z* = 1.77, *p* = 0.0384, one-tailed). With the outlier excluded, the correlation between composite rhythm discrimination and working memory reached significance for controls, *r*(90) = 0.22, *p* = 0.036, but the correlation for AWS was still significantly larger (z = 2.08, *p* = 0.0188, one-tailed).
